# Supplementary material for: Electronic and optical properties of surface-functionalized armchair graphene nanoribbons
Source: Royal Society of Chemistry journal article supplement (doi:10.1039/c5ra22701a), 2016-01-01
Supplement: c5ra22701a1.pdf [file c5ra22701a1.pdf]

## Supplementary Information

### Electronic and optical properties of surface-functionalized armchair graphene nanoribbons

Min Wang,<sup>\*ab</sup> Si Xing Song,<sup>ab</sup> Hai Xing Zhao,<sup>ab</sup> Yu Chen Wang<sup>ab</sup>

<sup>a</sup>Institute for Clean Energy & Advanced Materials, Faculty of Materials and Energy,  
Southwest University, Chongqing 400715, P. R. China. Email: minwang@swu.edu.cn

<sup>b</sup>Chongqing Key Laboratory for Advanced Materials and Technologies of Clean  
Energies, Chongqing 400715, P. R. China

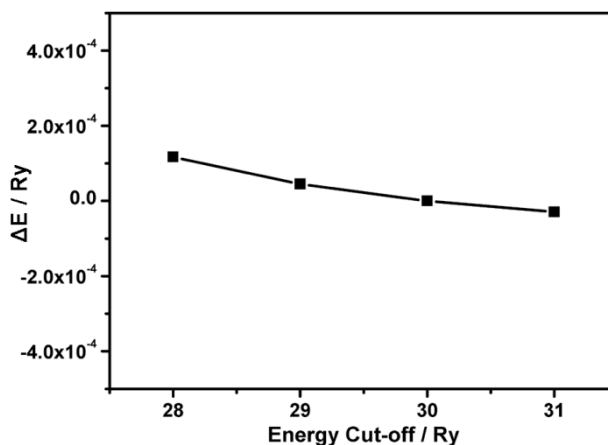

Fig. S1 The energy difference versus different energy cut-off.

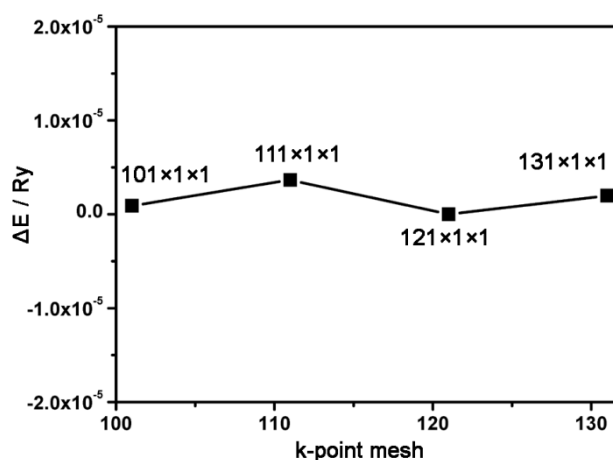

Fig. S2 The energy difference versus different k-point mesh.

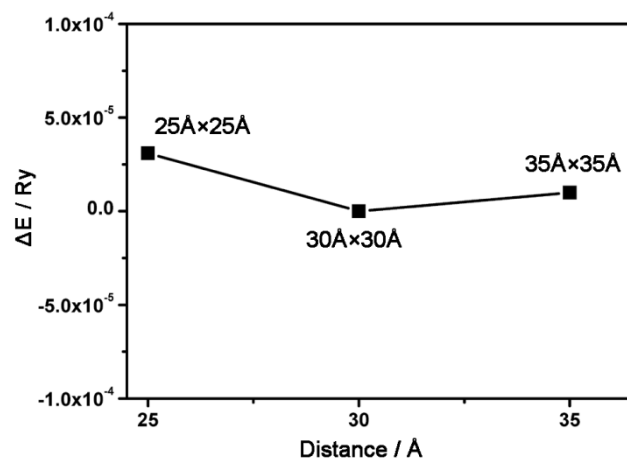

Fig. S3 The energy difference versus different separation along y and z direction.
